1 **Short Communication**

2 **Extreme conservation of miRNA complements in Opisthorchiids**

3 VLADIMIR Y. OVCHINNIKOV<sup>1</sup>, VIATCHESLAV A. MORDVINOV<sup>1</sup>, BASTIAN FROMM<sup>2\*</sup>

4 <sup>1</sup> Department of Human and Animal Genetics, The Federal Research Center Institute of  
5 Cytology and Genetics The Siberian Branch of the Russian Academy of Sciences, Prospekt  
6 Lavrentyeva 10, Novosibirsk, 630090, Russian Federation

7 <sup>2</sup> Department of Tumor Biology, Institute for Cancer Research, The Norwegian Radium  
8 Hospital, Oslo University Hospital, PO Box 4950, Nydalen, N-0424 Oslo, Norway

9 \*Corresponding author

10 Dr. Bastian Fromm  
11 Department of Tumor Biology, Institute for Cancer Research, The Norwegian Radium  
12 Hospital, Oslo University Hospital, PO Box 4950, Nydalen, N-0424 Oslo, Norway  
13 Tel: (47) 22 78 18 73  
14 Fax: (47) 22 85 18 35  
15 Email: [bastian.fromm@rr-research.no](mailto:bastian.fromm@rr-research.no)

16 **ABSTRACT (words: 100/250)**

17

18 MicroRNAs (miRNAs) are key players in parasite-host communication and potential biomarkers  
19 for the detection of parasitic infections from host blood. Consequently, it is crucial to precisely  
20 know the miRNA complements of medically important agents such as the liver flukes of the  
21 Opisthorchiidae. Using publicly available and new datasets we curated and reannotated the  
22 surprisingly small and variable miRNA complements previously described for *Opisthorchis*  
23 *viverrini*, *O. felineus* and *Clonorchis sinensis*. We find three highly similar miRNA complements  
24 with 53 identical and two miRNA genes with species specific sequences that signify a set of  
25 potential biomarkers and promising candidates for further investigations.

26

27 keywords: *Opisthorchis*, *Clonorchis*, microRNAs, biomarkers, host-parasite interaction

28 Liver flukes are parasitic flatworms that affect many different species of economic relevance and  
29 also infect humans. The medically most important group of liver-flukes is the Opisthorchiidae  
30 with Eurasian wide distributed species *Opisthorchis felineus*, *Opisthorchis viverrini* and  
31 *Clonorchis sinensis* (Figure 1) [1]. They are agents of human infections with Clonorchiasis /  
32 Opisthorchiasis transmitted by raw or undercooked fish and it is estimated that at least 1.2  
33 million people worldwide are infected with *O. felineus*, 10 million with *O. viverrini* and 35  
34 million with *C. sinensis* [2]. In humans, the infections are characterized by long durations, can  
35 occur with frequent exacerbations or without symptoms, and they may contribute to liver cancer  
36 development [3, 4]. Because Opisthorchiids are classified as biocarcinogens, they came into the  
37 focus of various “OMICS”-studies that aimed at their characterization and, ultimately,  
38 identification of biomarkers towards the development of treatments [5, 6]. One important class of  
39 potential biomarkers is microRNAs (miRNAs) and we and others have recently shown their  
40 importance in host-parasite communication and immune-modulation [7-9]. miRNAs are small  
41 non-coding RNAs that are post-transcriptional gene regulators with important roles in many  
42 biological processes [10]. Previously, miRNA complements of the 3 opisthorchiids were  
43 published and they showed a surprisingly variable number of miRNA genes (between 16 and 18  
44 conserved and between 20 and 43 novel genes) that was unexpected [11, 12]. The number of  
45 identified genes was also very low given the predictions from studies on miRNA evolution in  
46 flatworms [13] but most importantly no abundantly expressed miRNA was identified that  
47 showed sequential differences in all 3 species. The goal of our study was therefore first to curate  
48 and reannotate the miRNA complements of *O. viverrini*, *O. felineus* and *C. sinensis* and second  
49 to compare the complements for similarities and differences in expression and most importantly  
50 in sequential composition. Finally we describe expression differences in *O. felineus* stages for  
51 both miRNAs and mRNAs, identifying miRNA:mRNA interactions of possible importance for  
52 the development of *O. felineus*.

53 Altogether, in total, 1 billion small RNAseq reads of sixteen published miRNA NGS datasets for  
54 all 3 opisthorchiids [11, 12], the reference genomes for *O. viverrini* [14], *C. sinensis* [15] and  
55 the draft assembly of *O. felineus* (Ershov et al. in prep) were used. For RNAseq data we used  
56 annotations and expression levels directly from Pomanznoy et al [5]. Briefly, small RNAseq  
57 reads of the projects PRJNA270708 [11] and PRJNA127731 [12] were downloaded from the  
58 Sequence Read Archive (SRA) and processed as described before [11, 16]. Genomic references  
59 were downloaded from <http://parasite.wormbase.org/> (PRJDA72781 & PRJNA222628) and  
60 made available by Ershov et al respectively. Using the miRNA prediction algorithm MirMiner  
61 [17] & (Fromm et al in prep) and applying a consistent set of criteria for the annotation of  
62 miRNA genes [18], we reanalyzed and reannotated opisthorchiids' miRNAs.

63 We found that the miRNA complements of the three opisthorchiids are very similar and much  
64 larger than presumed: they are composed of 55 conserved miRNAs (34 families) shared by the  
65 three flatworms and only found support for 1 novel miRNA (Supplementary tables 1 and 2,  
66 Supplementary file 1). Our prediction algorithms found 35 previously missing conserved  
67 miRNA genes that belong to 22 conserved miRNA families and 1 novel miRNA gene. Further  
68 we rejected 96 previously described novel miRNA genes because they did not fulfill annotation  
69 criteria for *bona fide* miRNA genes [18] (Supplementary table 3). A noteworthy finding is that  
70 Mir-76 and the Mir-Novel-1 show sequential differences between the 3 species while having  
71 abundant expression levels (Figure 1).

72 When we compared the expression patterns of all miRNAs in the adult worm datasets of all three  
73 species we found that they are very similar, too. The top three expressed miRNAs in adults of all  
74 three species were Mir-10-P2a, Mir-71-P1 and Mir-281. It is worth noting that we were not able  
75 to detect expression of Mir-12 in *O. viverrini* and *O. felineus* but because the sequence is  
76 identical to the very little expressed version of Mir-12 in *C. sinensis* we included it for both  
77 species, too (Supplementary table 2, asterisks).

78 Nevertheless, the homogenous pattern of miRNA expression we observed among the different  
79 species was not found when we compared miRNA abundance in the different stages available for  
80 *O. felineus*. We found highly distinct miRNA expression patterns between the datasets for  
81 metacercariae and the adults (Figure 2, Supplementary table 4, Supplementary figure 1).  
82 Remarkably, we were unable to detect Mir-76, Mir-10-P3 and Mir-2160-P1 in the metacercariae  
83 datasets. Because miRNA regulate gene-expression on the mRNA level we asked if we can  
84 observe a connection between the reported mRNA level differences between adult and  
85 metacercarians and the miRNA level differences we observe between the adult *O. felineus* and  
86 metacercarian stages. Previously, the transcriptome analysis of two *O. felineus* stages identified  
87 12,665 distinct transcripts of those 903 were metacercariae specific and 648 adult specific. In  
88 total, seven pathways were significantly enriched for differentially expressed genes (Lysosome,  
89 Neuroactive ligand–receptor interaction, Phagosome, Riboflavin metabolism, ECM–receptor  
90 interaction, Tyrosine metabolism and Arginine and proline metabolism). Consequently, we  
91 performed bioinformatics miRNA target prediction on the 3'UTR sequences of mRNA  
92 downloaded from GenBank. To ensure that we identify highly likely targets we used the  
93 intersection of three widely used programs (RNAhybrid, PITA and TargetScan) and identified  
94 291 mRNA-targets for 46 miRNAs of *O. felineus* (Supplementary table 5).

95 We analyzed the predicted targets of adult specific miRNAs (Mir-76, Mir-10-P3 and Mir-2160-  
96 P1), five most upregulated (Mir-2160-P2, Mir-1989, Mir-210-P1, Let-7-P3 and Mir-2-P3a) and  
97 five most downregulated miRNAs (Mir-1992, Mir-67, Mir-133, Mir-184 and Mir-7-P2) in the  
98 adult stage. All targets that did not follow prediction were excluded from further analysis. Of the  
99 61 predicted targets for the 13 enriched miRNAs (3 adult specific, 5 upregulated in adult stage  
100 and 5 upregulated in metacercariae stage), 32 target mRNAs were found to behave according to  
101 a model of miRNA:mRNA interaction (Supplementary figure 2). Based on the available  
102 annotation of *O. felineus* mRNA we see several miRNAs that target metabolic processes such as  
103 transcription, DNA replication and autophagy upregulated in metacercariae and their targets are

104 downregulated (Supplementary table 6). This is consistent with the resting state of  
105 metacercariae. Among all the downregulated targets of upregulated miRNAs in the adult stage  
106 we would like to particular mention one target of the highly deregulated Mir-2160-P2:  
107 GBJA01010536. It is a 5-hydroxytryptamine receptor 7 homolog (5HT7) and has been shown to  
108 significantly decrease motility when downregulated in *Schistosoma mansoni* adults and larvae  
109 [19]. The fact that the 5HT7 has a tenfold decreased expression in the adult *O. felineus* compared  
110 to the metacercariae requires further research. Although miRNA and mRNA datasets derive from  
111 different studies, it seems that they can be used to arrive at interesting hypotheses that present the  
112 basis for further studies of the biology of trematode development.

113 Altogether, we find that putative variation of microRNAs was an artifact and based on the  
114 incorrect annotation of miRNAs. Indeed, the Eurasian wide distributed opisthorchiids show  
115 extreme conservation of their miRNA complements which implies a very recent evolutionary  
116 split or even conspecificity as previously shown for monogenean parasites [20]. Further  
117 sampling of more strains is warranted in order to investigate their relationship and taxonomic  
118 status. Regardless of status, the three organisms vary in two mature miRNAs that could be used  
119 to differentiate them. The numerous newly identified conserved miRNAs and their stage specific  
120 expression profiles represent potent targets for further downstream analyses, biomarker  
121 discovery and disease control.

## 122 **Acknowledgments**

123 This work was supported by the state project of the Institute of Cytology and Genetics,  
124 the Siberian Branch of the Russian Academy of Sciences, [project No. 0324-2016-0002]. B.F.  
125 was supported by the South- Eastern Norway Regional Health Authority grant #2014041. The  
126 authors thank Michael Hackenberg for help with data acquisition from the SRA. The Siberian  
127 Branch of the Russian Academy of Sciences (SB RAS) Siberian Supercomputer Center is  
128 gratefully acknowledged for providing supercomputer facilities.

129 **REFERENCES (20 /20)**

- 130 [1] S. King, T. Scholz, Trematodes of the family Opisthorchiidae: a minireview., *The Korean journal of*  
131 *parasitology* 39 (2001) 209-21.
- 132 [2] T. Furst, J. Keiser, J. Utzinger, Global burden of human food-borne trematodiasis: a systematic review  
133 and meta-analysis, *The Lancet. Infectious diseases* 12(3) (2012) 210-21.
- 134 [3] B. Sripa, P.J. Brindley, J. Mulvenna, T. Laha, M.J. Smout, E. Mairiang, J.M. Bethony, A. Loukas, The  
135 tumorigenic liver fluke *Opisthorchis viverrini* - multiple pathways to cancer, *Trends Parasitol* 28(10)  
136 (2012) 395-407.
- 137 [4] M.Y. Pakharukova, V.A. Mordvinov, The liver fluke *Opisthorchis felinus*: biology, epidemiology and  
138 carcinogenic potential, *Transactions of the Royal Society of Tropical Medicine and Hygiene* 110(1) (2016)  
139 28-36.
- 140 [5] M.Y. Pomaznoy, M.D. Logacheva, N.D. Young, A.A. Penin, N.I. Ershov, A.V. Katokhin, V.A. Mordvinov,  
141 Whole transcriptome profiling of adult and infective stages of the trematode *Opisthorchis felinus*,  
142 *Parasitology international* 65(1) (2016) 12-9.
- 143 [6] J. Plieskatt, G. Rinaldi, Y.J. Feng, J. Peng, S. Easley, X.Y. Jia, J. Potriquet, C. Pairojkul, V. Bhudhisawasdi,  
144 B. Sripa, P.J. Brindley, J. Bethony, J. Mulvenna, A microRNA profile associated with *Opisthorchis viverrini*-  
145 induced cholangiocarcinoma in tissue and plasma, *BMC cancer* 15 (2015).
- 146 [7] B. Fromm, V. Ovchinnikov, E. Hoye, D. Bernal, M. Hackenberg, A. Marcilla, On the presence and  
147 immunoregulatory functions of extracellular microRNAs in the trematode *Fasciola hepatica*, *Parasite*  
148 *immunology* (2016).
- 149 [8] L.H. Zhu, J.T. Liu, J.W. Dao, K. Lu, H. Li, H.M. Gu, J.M. Liu, X.G. Feng, G.F. Cheng, Molecular  
150 characterization of *S. japonicum* exosome-like vesicles reveals their regulatory roles in parasite-host  
151 interactions, *Scientific reports* 6 (2016).
- 152 [9] C.G. Crist, D. Montarras, G. Pallafacchina, D. Rocancourt, A. Cumano, S.J. Conway, M. Buckingham,  
153 Muscle stem cell behavior is modified by microRNA-27 regulation of Pax3 expression, *Proceedings of the*  
154 *National Academy of Sciences of the United States of America* 106(32) (2009) 13383-7.
- 155 [10] E. Berezikov, Evolution of microRNA diversity and regulation in animals, *Nature Reviews Genetics*  
156 12(12) (2011) 846-860.
- 157 [11] V.Y. Ovchinnikov, D.A. Afonnikov, G.V. Vasiliev, E.V. Kashina, B. Sripa, V.A. Mordvinov, A.V.  
158 Katokhin, Identification of microRNA genes in three opisthorchiids, *PLoS neglected tropical diseases* 9(4)  
159 (2015) e0003680.
- 160 [12] M.-J. Xu, Q. Liu, A.J. Nisbet, X.-Q. Cai, C. Yan, R.-Q. Lin, Z.-G. Yuan, H.-Q. Song, X.-H. He, X.-Q. Zhu,  
161 Identification and characterization of microRNAs in *Clonorchis sinensis* of human health significance.,  
162 *BMC genomics* 11 (2010) 521.
- 163 [13] B. Fromm, M.M. Worren, C. Hahn, E. Hovig, L. Bachmann, Substantial Loss of Conserved and Gain of  
164 Novel MicroRNA Families in Flatworms, *Molecular biology and evolution* 30(12) (2013) 2619-28.
- 165 [14] N.D. Young, N. Nagarajan, S.J. Lin, P.K. Korhonen, A.R. Jex, R.S. Hall, H. Safavi-Hemami, W.  
166 Kaewkong, D. Bertrand, S. Gao, Q. Seet, S. Wongkham, B.T. Teh, C. Wongkham, P.M. Intapan, W.  
167 Maleewong, X. Yang, M. Hu, Z. Wang, A. Hofmann, P.W. Sternberg, P. Tan, J. Wang, R.B. Gasser, The  
168 *Opisthorchis viverrini* genome provides insights into life in the bile duct., *Nature communications* 5  
169 (2014) 4378.
- 170 [15] X. Wang, W. Chen, Y. Huang, J. Sun, J. Men, H. Liu, F. Luo, L. Guo, X. Lv, C. Deng, C. Zhou, Y. Fan, X.  
171 Li, L. Huang, Y. Hu, C. Liang, X. Hu, J. Xu, X. Yu, The draft genome of the carcinogenic human liver fluke  
172 *Clonorchis sinensis*., *Genome biology* 12 (2011) R107.
- 173 [16] B. Fromm, M. Trelis, M. Hackenberg, F. Cantalapiedra, D. Bernal, A. Marcilla, The revised microRNA  
174 complement of *Fasciola hepatica* reveals a plethora of overlooked microRNAs and evidence for  
175 enrichment of immuno-regulatory microRNAs in extracellular vesicles, *International journal for*  
176 *parasitology* 45(11) (2015) 697-702.
- 177 [17] B.M. Wheeler, A.M. Heimberg, V.N. Moy, E.A. Sperling, T.W. Holstein, S. Heber, K.J. Peterson, The  
178 deep evolution of metazoan microRNAs, *Evolution and Development* 11 (2009) 50-68.

- 179 [18] B. Fromm, T. Billipp, L.E. Peck, M. Johansen, J.E. Tarver, B.L. King, J.M. Newcomb, L.F. Sempere, K.  
180 Flatmark, E. Hovig, K.J. Peterson, A Uniform System for the Annotation of Vertebrate microRNA Genes  
181 and the Evolution of the Human microRNAome, *Annual review of genetics* 49 (2015) 213-42.  
182 [19] N. Patocka, N. Sharma, M. Rashid, P. Ribeiro, Serotonin signaling in *Schistosoma mansoni*: a  
183 serotonin-activated G protein-coupled receptor controls parasite movement, *PLoS pathogens* 10(1)  
184 (2014) e1003878.  
185 [20] B. Fromm, S. Burow, C. Hahn, L. Bachmann, MicroRNA loci support conspecificity of *Gyrodactylus*  
186 *salaris* and *Gyrodactylus thymalli* (Platyhelminthes: Monogenea), *International journal for parasitology*  
187 44(11) (2014) 787-93.

188

189

190



191           Figure 1. Distribution of opisthorchiids in Eurasia and how they differ in the two variable  
192 miRNA loci. Light grey dots indicate locations where *O. felineus* was detected, dark grey dots –  
193 *C. sinensis*, black dots – *O. viverrini*. Mature miRNAs are highlighted by black color.  
194 Differences in mature and star sequences are indicated by black circles.

195           Figure 2. Differential expression of miRNAs between adult and metacercariae stages.

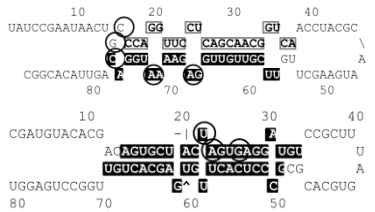

Ofe-Mir-76

Ofe-Mir-new1

Csi-Mir-76

Csi-Mir-new1

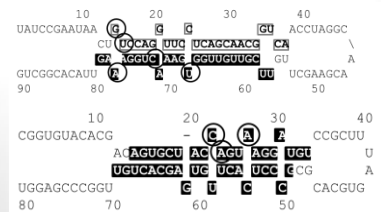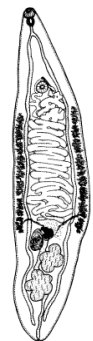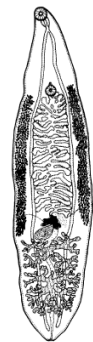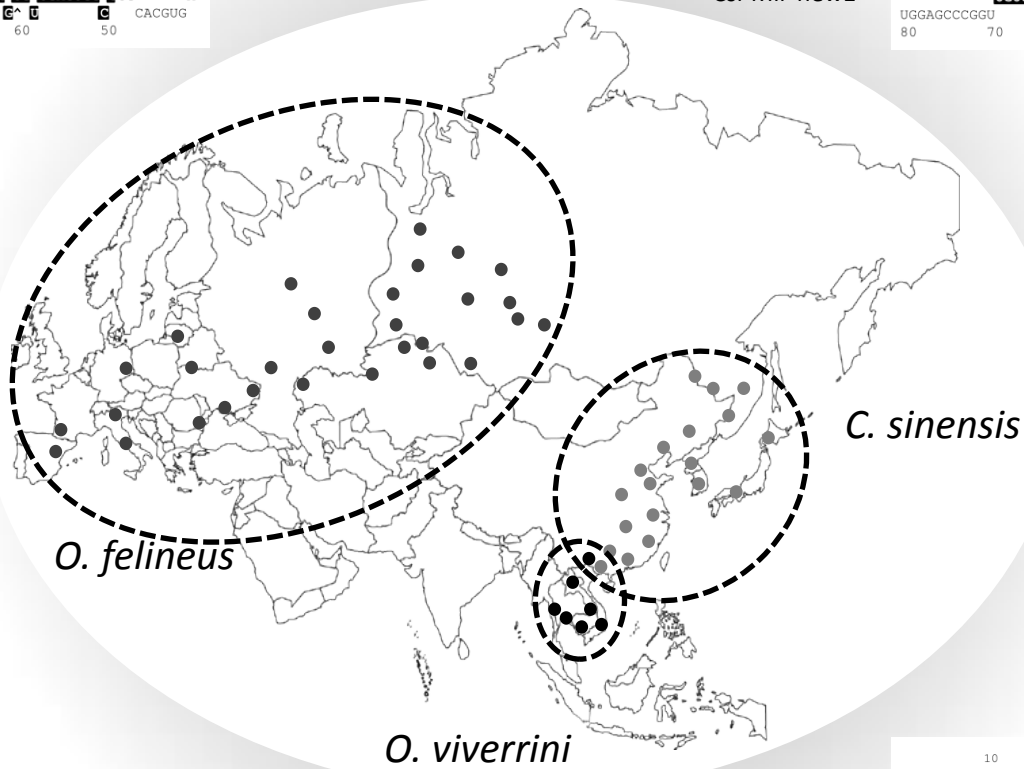

*O. felinus*

*C. sinensis*

*O. viverrini*

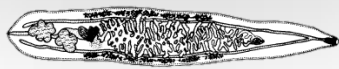

Ovi-Mir-76

Ovi-Mir-new1

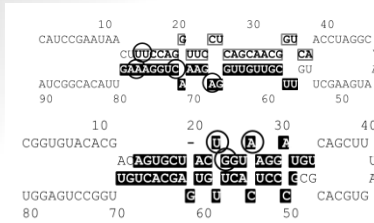

LogFC

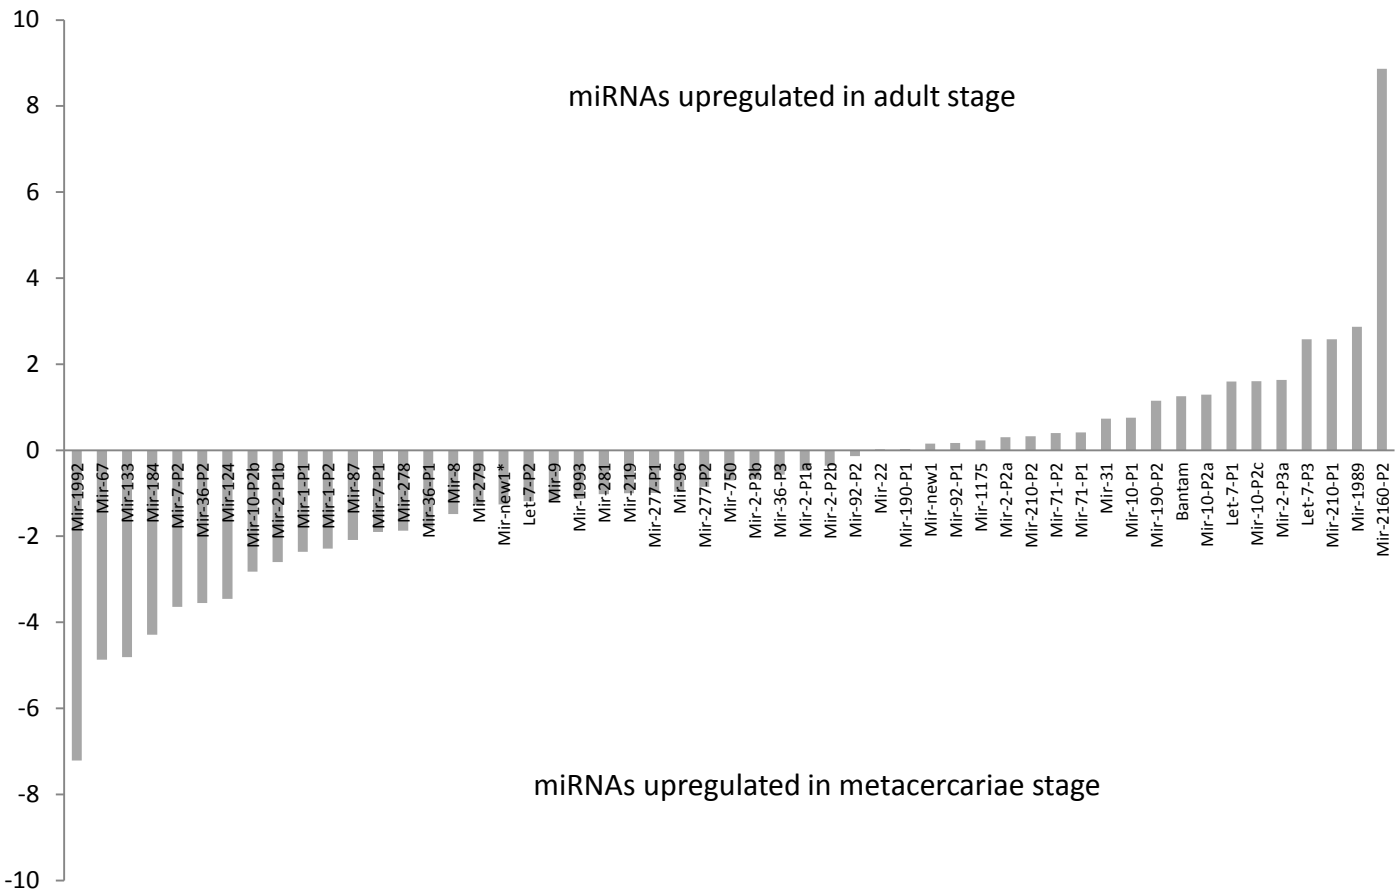

Source: https://www.biorxiv.org/content/10.1101/146654v1.full.pdf
